# Supplementary material
Source: MDPI journal article supplement (https://www.mdpi.com/2079-9276/11/7/64)
Supplement: s1 [file s1]

# Neighborhood-Scale Urban Water Reclamation with Integrated Resource Recovery for Establishing Nexus City in Munich, Germany: Pipe Dream or Reality?

Mohammed S. M. Al-Azzawi, Daphne Gondhalekar \* and Jörg E. Drewes

Chair of Urban Water Systems Engineering, Technical University of Munich, 80333 Munich, Germany;  
 mohammed.al-azzawi@tum.de (M.S.M.A.-A.); jdrewes@tum.de (J.E.D.)

\* Correspondence: d.gondhalekar@tum.de

## Supplementary Materials:

**Table S1.** Project statistics in the neighborhood Jenfelder Au [3,4].

| Parameter                           | Unit                                                                            | Remarks                                            |
|-------------------------------------|---------------------------------------------------------------------------------|----------------------------------------------------|
| In operation since                  | October 2013                                                                    |                                                    |
| Capacity                            | 2,000 people                                                                    |                                                    |
| Capital costs                       | 7,810,000 €                                                                     |                                                    |
| Operational costs                   | 64,000 €/year<br>(32 €/capita/year)                                             |                                                    |
| Blackwater generated                | 12 m <sup>3</sup> /day                                                          |                                                    |
| Final sludge quantity               | 150 tons/year                                                                   |                                                    |
| Expected biogas yields              | 340,000 m <sup>3</sup> /year                                                    | With added fat of around 9000 m <sup>3</sup> /year |
| Energy requirement                  | 35.8 kWh <sub>el</sub> /capita/year<br>Plus 200 kWh <sub>th</sub> /capita/year* | *As heating energy for the digester                |
| Expected net electricity generation | 339.7 kWh <sub>el</sub> /capita/year                                            |                                                    |
| Expected net heating generated      | 578 – 711 kWh <sub>th</sub> /capita/year                                        | With the use of sludge heat recovery               |

**Table S2.** Available project statistics in the neighborhood of Lanxmeer [5,6].

| Parameter                         | Unit                                     | Remarks |
|-----------------------------------|------------------------------------------|---------|
| In operation since                | 1999                                     |         |
| Capacity                          | 250 houses + hotel and conference center |         |
| Slurry leaving the digester       | 5 m <sup>3</sup> /day                    |         |
| Net electricity generation        | 81 kWh <sub>el</sub> /day                |         |
| CO <sub>2</sub> reduction overall | 192 kg/house/year                        |         |

**Table S3.** Available project's statistics in the neighborhood of Flintenbreite [7].

| Parameter                            | Unit                                                     | Remarks                                                                                           |
|--------------------------------------|----------------------------------------------------------|---------------------------------------------------------------------------------------------------|
| In operation since                   | 2002                                                     |                                                                                                   |
| Capacity                             | 117 apartments for 350-380 people                        |                                                                                                   |
| Generated wastewater quantity        | 4.8 L/capita/day blackwater<br>56 L/capita/day greywater |                                                                                                   |
| Electricity consumption              | 25 kWh <sub>el</sub> /capita/year                        | For vacuum toilets                                                                                |
| Capital cost                         | 20 million €                                             |                                                                                                   |
| Cost of the treatment facility alone | 600,000 €                                                | 40% higher than an equivalent conventional system, but operational costs expected to be 25% lower |

**Table S4.** Available project's statistics in the neighborhood of Knittlingen [8].

| Parameter          | Unit                          | Remarks                                                                                  |
|--------------------|-------------------------------|------------------------------------------------------------------------------------------|
| In operation since | 2009                          |                                                                                          |
| Capacity           | 100 apartments for 350 people | Currently around half of that number are living there (175) as of the last review (2010) |

|                          |                                 |                                                                                                  |
|--------------------------|---------------------------------|--------------------------------------------------------------------------------------------------|
| Theoretical biogas yield | 80 L/capita/day or 28,000 L/day | With the addition of organic waste from kitchens using macerators                                |
| Current max biogas yield | 8,000 L/day                     | 5,000 L/day from the digester plus 3,000 L/day from the AnMBR. This value is for 175 people only |
| Expected flux            | 20 L/m <sup>2</sup> /h          | Flux in winter can go down to 12-14 L/m <sup>2</sup> /h                                          |

**Table S5.** Project statistics in the neighborhood of Allermöhe [9].

| Parameter                                              | Unit                                 | Remarks                                                                                                                                                           |
|--------------------------------------------------------|--------------------------------------|-------------------------------------------------------------------------------------------------------------------------------------------------------------------|
| In operation since                                     | 1986 (First stage)                   |                                                                                                                                                                   |
| Capacity                                               | 36 single family houses, 140 people  |                                                                                                                                                                   |
| Water saved by using waterless toilets                 | 40 L/capita/day                      |                                                                                                                                                                   |
| Generated wastewater                                   | 82 L/capita/day                      | Compared to 128 L/capita/day in Munich (Van Houtte & Verbauwhede, 2012)                                                                                           |
| Treated Greywater quantity                             | 3650 – 4,700 m <sup>3</sup> /year    |                                                                                                                                                                   |
| Cost of CWT construction                               | 95,000 €                             | This was in 1983-1986 where the technology was in its infancy, expected prices today should be much lower                                                         |
| Area of the CWT for greywater treatment (Vertical CTW) | 240 m <sup>2</sup>                   | Amounts to around 1.7 m <sup>2</sup> /capita, which is much lower than 2.5 m <sup>2</sup> /capita typically required when no grey-water separation is implemented |
| Expected annual cost savings                           | 18,000 €/year<br>(130 €/capita/year) |                                                                                                                                                                   |

**Table S6.** Summary of the current situation [11,26].

| Parameter                                      | Unit                                             | Remarks                                                                                          |
|------------------------------------------------|--------------------------------------------------|--------------------------------------------------------------------------------------------------|
| Capacity                                       | 3 million people                                 | Two centralized treatment plants in Munich                                                       |
| Length of sewerage network                     | 2413 km + 918 km*                                | *from extra syndicates                                                                           |
| Cost of sewage disposal                        | 1.56 €/m <sup>3</sup>                            |                                                                                                  |
| Cost of rainwater disposal in mixed network    | 1.3 €/m <sup>2</sup>                             | Annual fee per surface area for rainwater                                                        |
| Costs for piping maintenance/expansion         | 192.3 million €                                  | For projects starting from 2000 till 2021. However most spending is after 2015                   |
| Maintenance/ upgrades for treatment plants     | 288.45 million €                                 | For projects starting from 2000 till 2021. However most spending is after 2015                   |
| Upgrades to dumping site                       | 48 million €                                     | * 2005 - 2017                                                                                    |
| Total costs for maintaining the current system | 528.75 million €                                 | In 20 years, so around 26.4375 Million €/year. For current population around 14.94 €/capita/year |
| Typical water consumption                      | 128 L/capita/day, incl. 38 L for toilet flushing | *source: (SWM, 2015)                                                                             |
| Total sewage discharge                         | 165.5 million m <sup>3</sup> /year               | in 2015                                                                                          |
| Dry sewage discharge                           | 145.9 million m <sup>3</sup> /year               | in 2015                                                                                          |

**Table S7.** Demonstration plant statistics in Am Römerweg between Nov. 2009 and July 2010, the values between the brackets are the min and max values, the value outside the bracket is the average for the observed period [8].

| Parameter  | Influent       | Effluent       | Removal efficiency |
|------------|----------------|----------------|--------------------|
| COD [mg/L] | 914 (425-1215) | 135 (63.8-280) | 85%                |

|                           |                |                  |           |
|---------------------------|----------------|------------------|-----------|
| N <sub>total</sub> [mg/L] | 109 (77.5-151) | 110 (76-135)     | 0%        |
| NH <sub>4</sub> -N [mg/L] | 88 (55.8-127)  | 94.4(70.3-116)   | 0%        |
| PO <sub>4</sub> -P [mg/L] | 13.1 (9.87-17) | 12.6 (8.62-13.8) | 0%        |
| Total coliforms [CFU/ml]  | 1.5E7          | 5.8 (0-17)       | 99.99996% |
| E. coli [CFU/ml]          | 2.9E6          | 0                | 100%      |

**Table S8.** Results from the pilot project in the study of [12].

| Parameter                 | Influent    | Effluent    | Removal efficiency |
|---------------------------|-------------|-------------|--------------------|
| COD [mg/L]                | 425 ± 47    | 51 ± 10     | 88%                |
| NH <sub>4</sub> -N [mg/L] | 32.4 ± 11.6 | 31.1 ± 12.3 | 0%                 |
| NO <sub>3</sub> -N [mg/L] | 1.3 ± 0.4   | 1.1 ± 0.6   | 0%                 |
| TP [mg/L]                 | 4.3 ± 0.5   | 3.8 ± 0.7   | 0%                 |
| Turbidity [NTU]           | 38.7 ± 5.4  | <0.3        | >99%               |
| TSS [mg/L]                | 294 ± 33    | <0.8        | >99.5              |
| pH                        | 7.6 ± 0.3   | 7.0 ± 0.2   | -                  |

## References

- BINE Information Service. Energy from Wastewater Supplies Urban District. 2014. Available online: [http://www.bine.info/fileadmin/content/Presse/Projektinfos\\_2014/PM\\_09\\_2014/ProjektInfo\\_0914\\_engl\\_internetx.pdf](http://www.bine.info/fileadmin/content/Presse/Projektinfos_2014/PM_09_2014/ProjektInfo_0914_engl_internetx.pdf) (accessed on 24 October 2017).
- Hamburg Wasser. *Energetische Optimierung des HAMBURG WATER Cycle ® im Stadtquartier Jenfelder au Forschungsvorhaben 0327400Y Schlussbericht*; Hamburg Wasser: Hamburg, Germany, 2013.
- Van Timmeren, A. Decentralized Energy Generation and Waste (Water) Treatment in Residential Districts: The “Sustainable Implant”. 2007. Available online: <http://www.irbnet.de/daten/iconda/CIB5042.pdf> (accessed on 24 October 2017).
- Van Timmeren, A.; Tawil, M. Integration of Living Machine and Biogas Plant Case EVA Centre Lanxmeer, Culemborg, 6–8. 2006. Available online: [http://www.unige.ch/cuepe/html/plea2006/Vol1/PLEA2006\\_PAPER892.pdf](http://www.unige.ch/cuepe/html/plea2006/Vol1/PLEA2006_PAPER892.pdf) (accessed on 24 October 2017).
- Otter-Wasser. Case Study of Sustainable Sanitation Projects Ecological Housing Estate, Flintenbreite, Lübeck, Germany. 2009. Available online: [http://www.susana.org/\\_resources/documents/default/2-59-en-susana-cs-germany-luebeck-ecological-housing-bobx.pdf](http://www.susana.org/_resources/documents/default/2-59-en-susana-cs-germany-luebeck-ecological-housing-bobx.pdf) (accessed on 12 February 2022).
- Lazarova, V.; Takashi, A.; Bahri, A.; John, A. *Milestones in Water Reuse: The Best Success Stories*; The International Water Association: London, UK, 2013.
- Rauschning, G.; Berger, W.; Ebeling, B.; Schöpe, A. Ecological Settlement in Allermöhe Hamburg, Germany—Case Studies. 2009. Available online: <http://www.susana.org/en/resources/case-studies/details/56> (accessed on 26 September 2017).
- MSE: Münchner Stadtentwässerung. In *Geschäftsbericht 2015 Leitbild*; : StMUG, Munich, Germany, 2016.
- Hongjun, L.; Jianrong, C.; Fangyuan, W.; Linxian, D.; Huachang, H. Feasibility evaluation of submerged anaerobic membrane bioreactor for municipal secondary wastewater treatment. *Desalination* **2011**, *280*, 120–126. <https://doi.org/10.1016/J.DESAL.2011.06.058>.
- SWM: Stadtwerke München. M-Wasser—Erstklassiges Naturprodukt Direkt von der Quelle. 2015. Available online: <https://www.swm.de/dam/jcr:8b4ae6b1-0654-47db-bab4-e98037b32f7c/m-wasser-broschuere.pdf> (accessed on 29 October 2017).
